# Supplementary material for: Modification of manganese oxide by Ag loading with different synthesis methods for toluene combustion
Source: Royal Society of Chemistry journal article supplement (doi:10.1039/d5nj03074a), 2026-01-01
Supplement: d5nj03074a1.pdf [file d5nj03074a1.pdf]

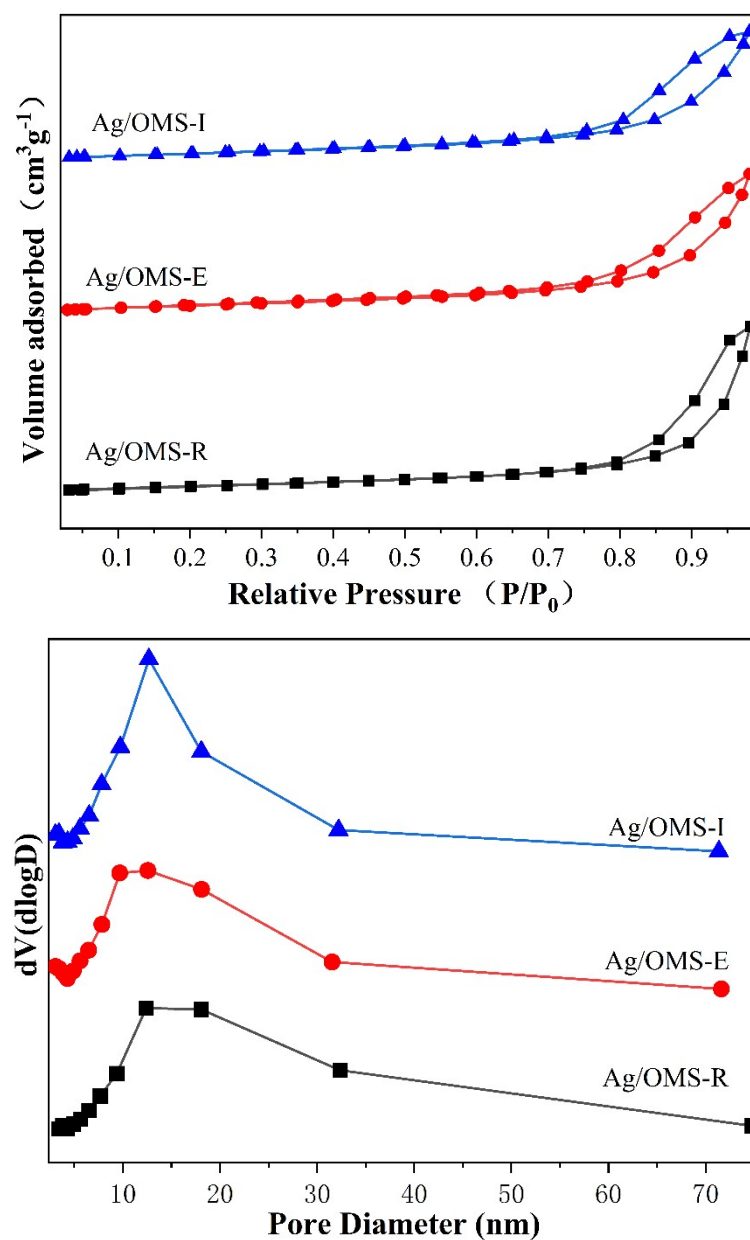

Fig. S1  $N_2$  adsorption/desorption isotherms and pore-size distribution of catalysts.

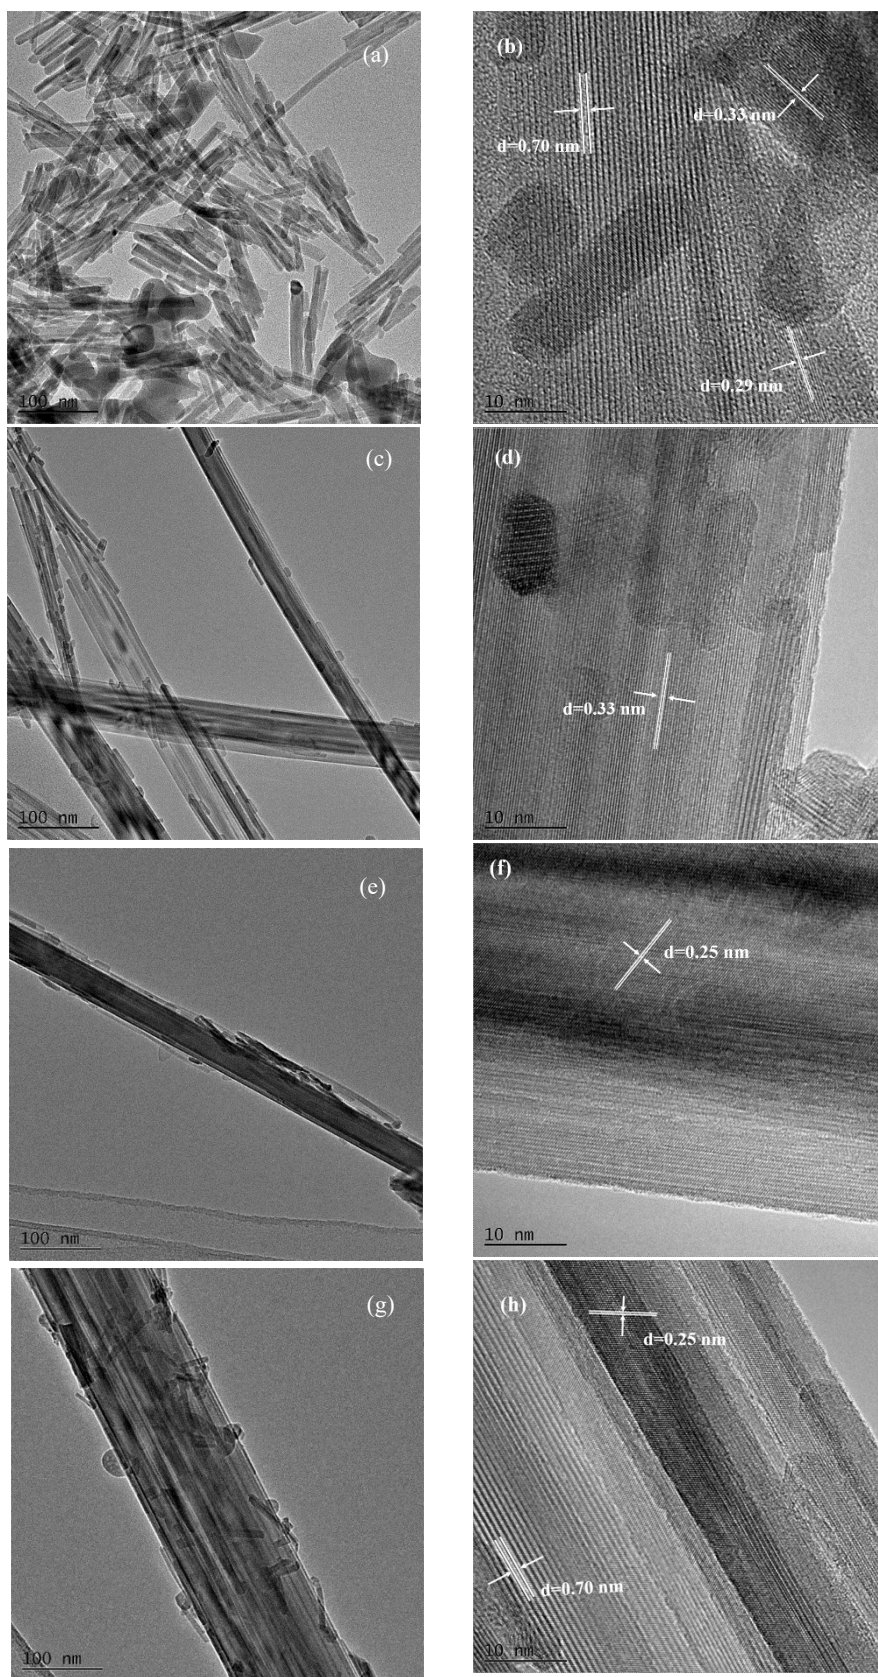

Fig. S2 TEM image of the samples: a-b: Ag/OMS-R, c-d: Ag/OMS-E, e-f: Ag/OMS-I (c) and g-h: OMS

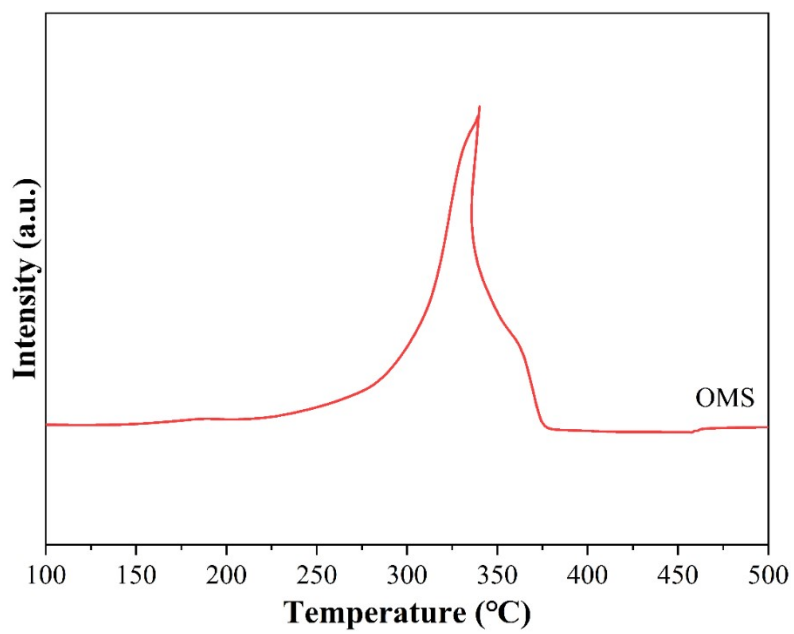

Fig. S3 TPR result of OMS sample

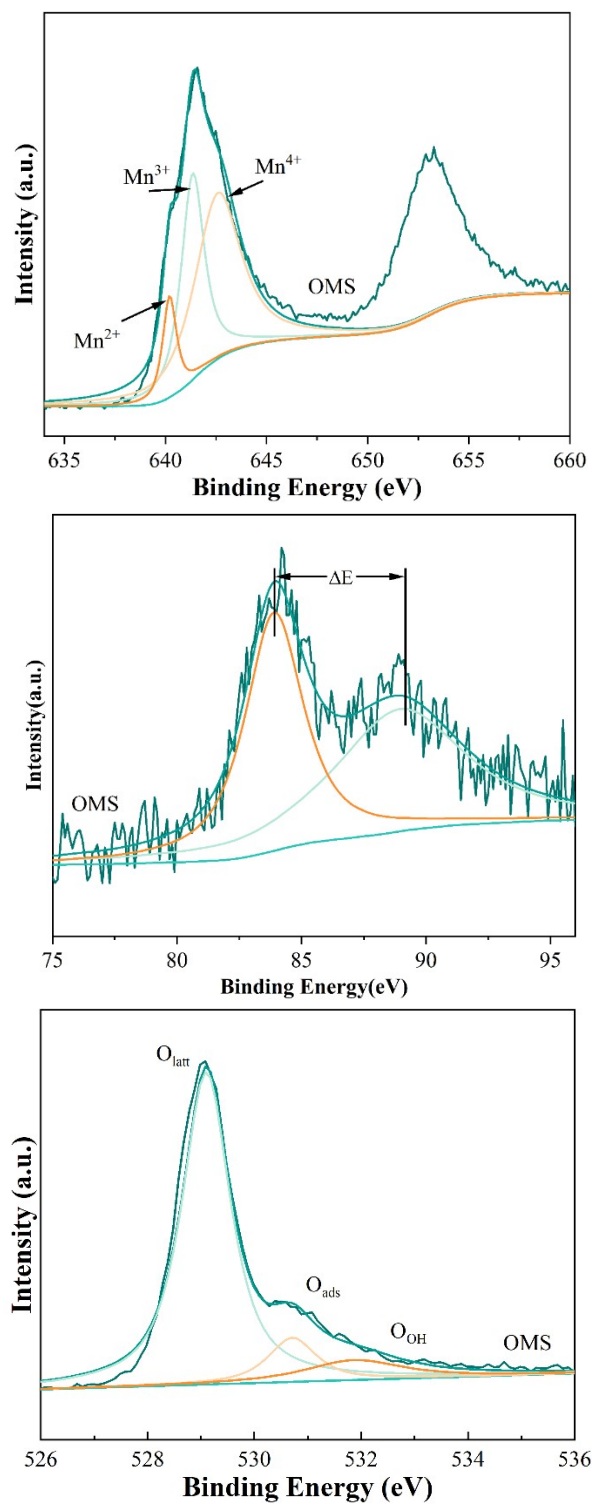

Fig. S4 XPS results of OMS sample
